# Supplementary material
Source: PubMed Central journal article supplement (PMC4288693)
Supplement: JB.01826-14_zjb999093421so1.pdf [file JB.01826-14_zjb999093421so1.pdf]

## Supplemental Figures

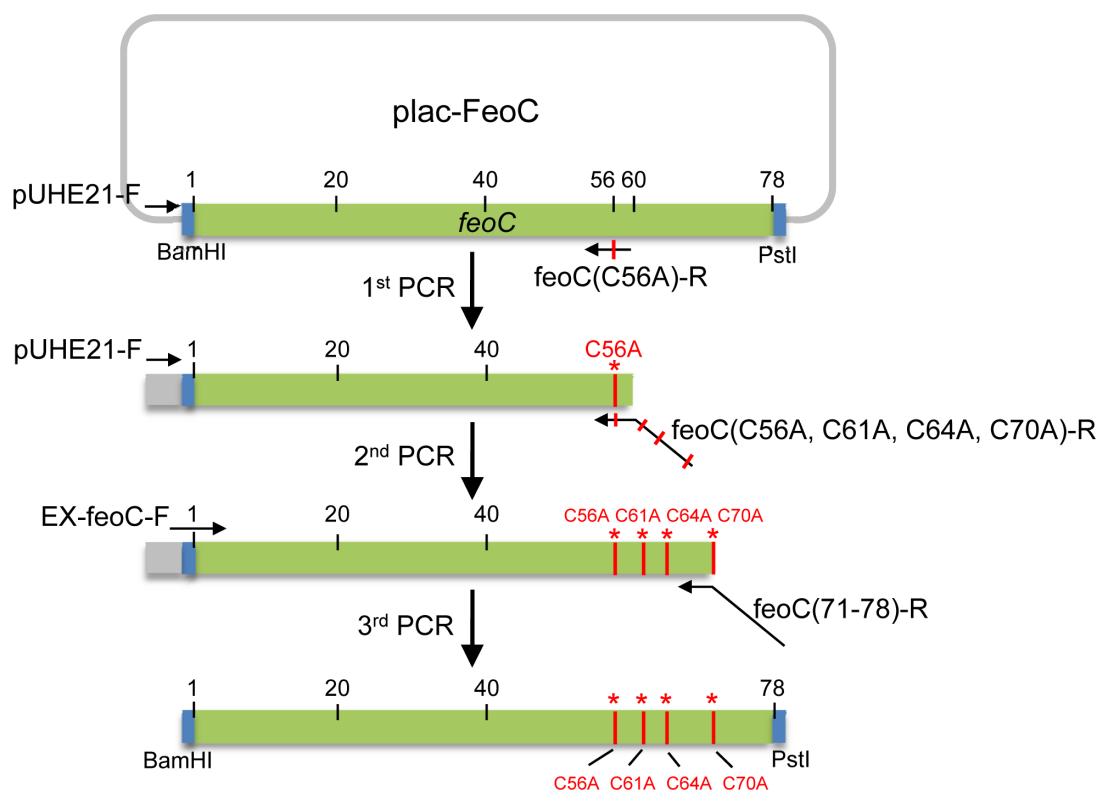

**Fig. S1.** A schematic representation illustrating the three steps of PCR that were employed for amplification of the *feoC* fragment carrying C56A, C61A, C64A, and C70A substitutions. The first step of PCR was conducted using the primer pair pUHE21-F/*feoC*(C56A)-R and the *plac-FeoC* plasmid as DNA templates. Using the resulting PCR products as DNA templates, the second step of PCR was conducted using the primer pair pUHE21-F/*feoC*(C56A, C61A, C64A, C70A)-R. Finally, these PCR products served as templates in the third step of PCR using the primer pair EX-*feoC*-F/*feoC*(71-78)-R. The sequences of primers used are listed in Table S1.

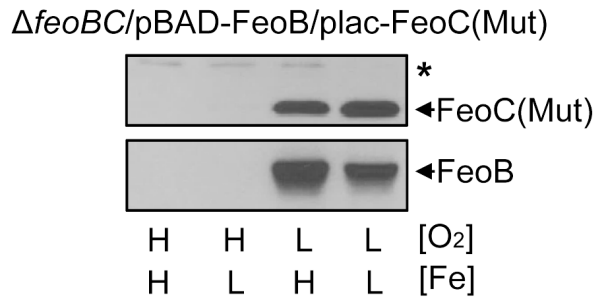

**Fig. S2.** Levels of FeoB and FeoC(Mut) were determined by immunoblot analysis in the *feoBC* deletion strain ( $\Delta feoBC$ , HK715) carrying the pBAD-FeoB and plac-FeoC(Mut) plasmids. FeoC(Mut) indicates mutant FeoC in which each of four Cys residues in the putative Fe-S cluster-binding site was substituted with Ala. The strain was grown in LB medium [High (H) Fe] or in LB medium supplemented with 0.2 mM deferoxamine [Low (L) Fe] under high-oxygen (H, O<sub>2</sub>) or low-oxygen (L, O<sub>2</sub>) conditions. The medium was also supplemented with arabinose (1.0 mM) and IPTG (0.125 mM) for FeoB production from pBAD-FeoB and FeoC(Mut) production from plac-FeoC, respectively. The band indicated with an asterisk (\*) corresponds to a protein displaying cross-reactivity against anti-the FeoC antibody and serves as an internal loading control.

## Supplemental Table

**Table S1.** Primers used in construction of plasmids.

| Primers                              | Sequences (5' to 3')                                                  |
|--------------------------------------|-----------------------------------------------------------------------|
| EX-lon-F                             | AGTCCGTCTAGACTAAACTAAGAGAGAGCTCTATG<br>AATC                           |
| EX-lon-R                             | ACAGCCAAGCTTACTATTTTGCGGTTACAACCTGCA<br>TTC                           |
| pUHE21-F                             | GTATCACGAGGCCCTTTCGTCTTCA                                             |
| feoC(C56A)-R                         | CAGCTGCCTGAAAGGGCGCCGTCCGGTTCCTTC                                     |
| feoC(C56A,<br>C61A, C64A,<br>C70A)-R | GGCGGCTTTACCTTCCGGAGCACTTTTAGCGCTGCC<br>TGAAAGGGCGCCGTCCGGTTC         |
| EX-feoC-F                            | GCGGATCCAAAATGGCTTCATTGATACAGGTTCGC                                   |
| feoC(71-78)-R                        | CGCTGCAGAGGTTAACGCAAGGCCACCATTTCGCG<br>CAGGGCGGCTTTACCTTCCGGAGCACTTTT |
